# Supplementary material for: SARS-CoV-2 Lineage A.27: New Data from African Countries and Dynamics in the Context of the COVID-19 Pandemic
Source: MDPI journal article supplement (doi:10.3390/v14051007), 2022-05-09
Supplement: s1 [file s1]

We gratefully acknowledge the following Authors from the Originating laboratories responsible for obtaining the specimens, as well as the Submitting laboratories where the genome data were generated and shared via GISAID, on which this research is based.

All Submitters of data may be contacted directly via [www.gisaid.org](http://www.gisaid.org)

Authors are sorted alphabetically.

Acknowledgement EPI\_SET Identifier: EPI\_SET\_20220308za

| Accession ID                                                                                                                                                                                                                                 | Originating Laboratory                                                 | Submitting Laboratory                                                                                                                      | Authors                                                                                                                                                                                                                                                                          |
|----------------------------------------------------------------------------------------------------------------------------------------------------------------------------------------------------------------------------------------------|------------------------------------------------------------------------|--------------------------------------------------------------------------------------------------------------------------------------------|----------------------------------------------------------------------------------------------------------------------------------------------------------------------------------------------------------------------------------------------------------------------------------|
| EPI_ISL_4537460                                                                                                                                                                                                                              | APHP Bichat-Claude Bernard                                             | APHP Bichat-Claude Bernard                                                                                                                 | Benoit Visseaux; Samuel Lebourgeois                                                                                                                                                                                                                                              |
| EPI_ISL_1155709, EPI_ISL_1155711, EPI_ISL_1155713                                                                                                                                                                                            | AX BIO OCEAN                                                           | CNR Virus des Infections Respiratoires - France SUD                                                                                        | Antonin Bal; Bruno Lina; Bruno Simon; Gregory Destras; Gwendolyne Burfin; Hadrien Regue; Laurence Josset; Martine Valette; Quentin Semanas                                                                                                                                       |
| EPI_ISL_1290839, EPI_ISL_1290840                                                                                                                                                                                                             | AXBIO                                                                  | CNR Virus des Infections Respiratoires - France SUD                                                                                        | Antonin Bal; Bruno Lina; Bruno Simon; Gregory Destras; Gwendolyne Burfin; Hadrien Regue; Laurence Josset; Martine Valette; Quentin Semanas                                                                                                                                       |
| EPI_ISL_1754503, EPI_ISL_2259273, EPI_ISL_2259279                                                                                                                                                                                            | BIOMNIS EUROFINS IVRY                                                  | Department of Virology, Henri Mondor University Hospital, Assistance Publique Hôpitaux de Paris, Université Paris-Est Créteil, INSERM U955 | Alexandre Soulier; Christophe Rodriguez; Elisabeth Trawinski; Guillaume Gricourt; Jean-Michel Pawlotsky; Melissa N'Debi; Slim Fourati; Vanessa Demontant                                                                                                                         |
| EPI_ISL_1239445, EPI_ISL_1253541, EPI_ISL_1253542, EPI_ISL_1253544, EPI_ISL_1253549, EPI_ISL_1253550, EPI_ISL_1253551, EPI_ISL_1290837, EPI_ISL_1290841, EPI_ISL_1312377, EPI_ISL_1312378                                                    | see above                                                              | BIOMNIS LYON                                                                                                                               | Antonin Bal; Bruno Lina; Bruno Simon; Gregory Destras; Gwendolyne Burfin; Hadrien Regue; Laurence Josset; Martine Valette; Quentin Semanas                                                                                                                                       |
| EPI_ISL_1312372, EPI_ISL_1312373, EPI_ISL_1312374, EPI_ISL_1312375                                                                                                                                                                           | BIOMNIS PARIS                                                          | CNR Virus des Infections Respiratoires - France SUD                                                                                        | Antonin Bal; Bruno Lina; Bruno Simon; Gregory Destras; Gwendolyne Burfin; Hadrien Regue; Laurence Josset; Martine Valette; Quentin Semanas                                                                                                                                       |
| EPI_ISL_1253568, EPI_ISL_1253569, EPI_ISL_1253570, EPI_ISL_1253571, EPI_ISL_1253572, EPI_ISL_1253573, EPI_ISL_1253577, EPI_ISL_1253578                                                                                                       | see above                                                              | BOURG LES VALENCE                                                                                                                          | Antonin Bal; Bruno Lina; Bruno Simon; Gregory Destras; Gwendolyne Burfin; Hadrien Regue; Laurence Josset; Martine Valette; Quentin Semanas                                                                                                                                       |
| EPI_ISL_1695975, EPI_ISL_1696011, EPI_ISL_1696013, EPI_ISL_2179502                                                                                                                                                                           | BROUSSAIS                                                              | Department of Virology, Henri Mondor University Hospital, Assistance Publique Hôpitaux de Paris, Université Paris-Est Créteil, INSERM U955 | Alexandre Soulier; Christophe Rodriguez; Elisabeth Trawinski; Guillaume Gricourt; Jean-Michel Pawlotsky; Melissa N'Debi; Slim Fourati; Vanessa Demontant                                                                                                                         |
| EPI_ISL_1707275, EPI_ISL_1707792                                                                                                                                                                                                             | Biogroup Bio Lam-LCD Saint-Denis                                       | Department of Virology, Henri Mondor University Hospital, Assistance Publique Hôpitaux de Paris, Université Paris-Est Créteil, INSERM U955 | Alexandre Soulier; Christophe Rodriguez; Elisabeth Trawinski; Guillaume Gricourt; Jean-Michel Pawlotsky; Melissa N'Debi; Slim Fourati; Vanessa Demontant                                                                                                                         |
| EPI_ISL_1749368                                                                                                                                                                                                                              | Biology Lab, HIA BEGIN                                                 | IRBA, 2MI                                                                                                                                  | CHAPUS C.; DEPEILLE A.; GORGE O.; GRANDPERRET V.; JARJAVAL F.; MERENS-GONTIER A.; NOLENT F.; SARILAR V.; VERGUET N.                                                                                                                                                              |
| EPI_ISL_1706829, EPI_ISL_1706830, EPI_ISL_1706832, EPI_ISL_1706833, EPI_ISL_1706835                                                                                                                                                          | C.H.C.B KERIO                                                          | Department of Virology, Henri Mondor University Hospital, Assistance Publique Hôpitaux de Paris, Université Paris-Est Créteil, INSERM U955 | Alexandre Soulier; Christophe Rodriguez; Elisabeth Trawinski; Guillaume Gricourt; Jean-Michel Pawlotsky; Melissa N'Debi; Slim Fourati; Vanessa Demontant                                                                                                                         |
| EPI_ISL_1287759                                                                                                                                                                                                                              | CDP HUSSEL VIENNE                                                      | CNR Virus des Infections Respiratoires - France SUD                                                                                        | Antonin Bal; Bruno Lina; Bruno Simon; Gregory Destras; Gwendolyne Burfin; Hadrien Regue; Laurence Josset; Martine Valette; Quentin Semanas                                                                                                                                       |
| EPI_ISL_1287752                                                                                                                                                                                                                              | CERBALLIANCE PACA                                                      | CNR Virus des Infections Respiratoires - France SUD                                                                                        | Antonin Bal; Bruno Lina; Bruno Simon; Gregory Destras; Gwendolyne Burfin; Hadrien Regue; Laurence Josset; Martine Valette; Quentin Semanas                                                                                                                                       |
| EPI_ISL_1313012, EPI_ISL_1313014                                                                                                                                                                                                             | CERBALLIANCE RHONE ALPES                                               | CNR Virus des Infections Respiratoires - France SUD                                                                                        | Antonin Bal; Bruno Lina; Bruno Simon; Gregory Destras; Gwendolyne Burfin; Hadrien Regue; Laurence Josset; Martine Valette; Quentin Semanas                                                                                                                                       |
| EPI_ISL_1910917                                                                                                                                                                                                                              | CH Bethune                                                             | CHU Lille                                                                                                                                  | AIT YAHYA Emilie; ALIDJINOUE Enagnon Kazali; BOCKET Laurence; CREPIN Michel; DEMAY Christophe; ENGELMANN Ilka; GEFFROY Sandrine; GUIGON Aurélie; LAMBERT Valérie; LAZREK Mouna; NOBILLIAUX Florian; PREVOST Brigitte; THUILLIER Caroline; TINEZ Claire                           |
| EPI_ISL_1671818                                                                                                                                                                                                                              | CH Bethune                                                             | CHU Lille - Laboratoire de Virologie                                                                                                       | AIT YAHYA Emilie; ALIDJINOUE Enagnon Kazali; BOCKET Laurence; CREPIN Michel; DEMAY Christophe; ENGELMANN Ilka; GEFFROY Sandrine; GUIGON Aurélie; LAMBERT Valérie; LAZREK Mouna; NOBILLIAUX Florian; PREVOST Brigitte; THUILLIER Caroline; TINEZ Claire                           |
| EPI_ISL_4646396                                                                                                                                                                                                                              | CH CAHORS                                                              | CHU Purpan - Laboratoire de Virologie - Institut Fédératif de Biologie                                                                     | Bulach T.; Donnadiou C.; Izopet J.; Latour J.; Milhes M.; Nicot F.; Ranger N.; Salin G.; Tremeaux P.                                                                                                                                                                             |
| EPI_ISL_1448016                                                                                                                                                                                                                              | CH MAUBEUGE                                                            | CHU Lille - Laboratoire de Virologie                                                                                                       | AIT YAHYA Emilie; ALIDJINOUE Enagnon Kazali; BOCKET Laurence; CREPIN Michel; DEMAY Christophe; ENGELMANN Ilka; GEFFROY Sandrine; GUIGON Aurélie; LAMBERT Valérie; LAZREK Mouna; NOBILLIAUX Florian; PREVOST Brigitte; TCHANTCHOU NJOSSE YANICK; THUILLIER Caroline; TINEZ Claire |
| EPI_ISL_1707498                                                                                                                                                                                                                              | CH VALENCE                                                             | CNR Virus des Infections Respiratoires - France SUD                                                                                        | Antonin Bal; Bruno Lina; Bruno Simon; Gregory Destras; Gwendolyne Burfin; Hadrien Regue; Laurence Josset; Martine Valette; Quentin Semanas                                                                                                                                       |
| EPI_ISL_1672661                                                                                                                                                                                                                              | CH.INTERCOMMUNAL DE CRETEIL                                            | Department of Virology, Henri Mondor University Hospital, Assistance Publique Hôpitaux de Paris, Université Paris-Est Créteil, INSERM U955 | Alexandre Soulier; Christophe Rodriguez; Elisabeth Trawinski; Guillaume Gricourt; Jean-Michel Pawlotsky; Melissa N'Debi; Slim Fourati; Vanessa Demontant                                                                                                                         |
| EPI_ISL_2011683                                                                                                                                                                                                                              | CHU Angoulême                                                          | CHU Poitiers                                                                                                                               | Agnes BEBY-DEFAUX; Birama N'DIAYE; Caroline MICHAUD; Manon PRAT; Maxime PICHON; Nicolas LEVEQUE                                                                                                                                                                                  |
| EPI_ISL_6157234                                                                                                                                                                                                                              | CHU Pontchailou                                                        | CHU Pontchailou                                                                                                                            | DE TAYRAC Marie; DENOUAL Florent; ETCHEVERRY Amandine; FEBREAU Christine; GALIBERT Marie Dominique; GROLHIER Claire; JAGLINE Steven; PRONIER Charlotte; QUENET Benjamin; SASSI Mohamed; THIBAUT Vincent                                                                          |
| EPI_ISL_1425079, EPI_ISL_1448425, EPI_ISL_4647979                                                                                                                                                                                            | CHU Purpan - Laboratoire de Virologie - Institut Fédératif de Biologie | CHU Purpan - Laboratoire de Virologie - Institut Fédératif de Biologie                                                                     | Agnès Harter; Bulach T.; Donnadiou C.; Izopet J.; Jacques Izopet; Justine Latour; Latour J.; Martine Dubois; Milhes M.; Nicolas Jeanne; Nicot F.; Noémie Ranger; Pauline Boyer; Pauline Tremeaux; Ranger N.; Romain Carcenac; Salin G.; Tremeaux P.                              |
| EPI_ISL_1290836                                                                                                                                                                                                                              | CHU Rennes                                                             | CNR Virus des Infections Respiratoires - France SUD                                                                                        | Antonin Bal; Bruno Lina; Bruno Simon; Gregory Destras; Gwendolyne Burfin; Hadrien Regue; Laurence Josset; Martine Valette; Quentin Semanas                                                                                                                                       |
| EPI_ISL_1313709, EPI_ISL_1707485                                                                                                                                                                                                             | CHU ST ETIENNE HOPITAL NORD                                            | CNR Virus des Infections Respiratoires - France SUD                                                                                        | Antonin Bal; Bruno Lina; Bruno Simon; Gregory Destras; Gwendolyne Burfin; Hadrien Regue; Laurence Josset; Martine Valette; Quentin Semanas                                                                                                                                       |
| EPI_ISL_1239446, EPI_ISL_1253567, EPI_ISL_1312825, EPI_ISL_1313667, EPI_ISL_1313693, EPI_ISL_1314016, EPI_ISL_1707523, EPI_ISL_1707526, EPI_ISL_1707528, EPI_ISL_1707536, EPI_ISL_1707537                                                    | see above                                                              | CNR Virus des Infections Respiratoires - France SUD                                                                                        | Antonin Bal; Bruno Lina; Bruno Simon; Gregory Destras; Gwendolyne Burfin; Hadrien Regue; Laurence Josset; Martine Valette; Quentin Semanas                                                                                                                                       |
| EPI_ISL_1483780                                                                                                                                                                                                                              | Centre De Prelevement COVID RIOM                                       | CHU Clermont-Ferrand, service de virologie                                                                                                 | Bisseux Maxime; Combes Patricia; Henquell Cécile; Mirand Audrey                                                                                                                                                                                                                  |
| EPI_ISL_1706459                                                                                                                                                                                                                              | Centre Hospitalier Eure Seine                                          | Centre Hospitalier Universitaire de Rouen Laboratoire de Virologie                                                                         | Alice Moisan; Fabienne De Oliveira; Marie Leoz                                                                                                                                                                                                                                   |
| EPI_ISL_1483774, EPI_ISL_1483776, EPI_ISL_1483786, EPI_ISL_1490236                                                                                                                                                                           | Centre Hospitalier Universitaire Clermont-Ferrand                      | CHU Clermont-Ferrand, service de virologie                                                                                                 | Bisseux Maxime; Combes Patricia; Henquell Cécile; Mirand Audrey                                                                                                                                                                                                                  |
| EPI_ISL_4646385                                                                                                                                                                                                                              | Centre Hospitalier de Lavaur                                           | CHU Purpan - Laboratoire de Virologie - Institut Fédératif de Biologie                                                                     | Bulach T.; Donnadiou C.; Izopet J.; Latour J.; Milhes M.; Nicot F.; Ranger N.; Salin G.; Tremeaux P.                                                                                                                                                                             |
| EPI_ISL_1312896                                                                                                                                                                                                                              | DYOMEDEA LYON                                                          | CNR Virus des Infections Respiratoires - France SUD                                                                                        | Antonin Bal; Bruno Lina; Bruno Simon; Gregory Destras; Gwendolyne Burfin; Hadrien Regue; Laurence Josset; Martine Valette; Quentin Semanas                                                                                                                                       |
| EPI_ISL_1457768                                                                                                                                                                                                                              | DYOMEDEA SAUVEGARDE LYON                                               | CNR Virus des Infections Respiratoires - France SUD                                                                                        | Antonin Bal; Bruno Lina; Bruno Simon; Gregory Destras; Gwendolyne Burfin; Hadrien Regue; Laurence Josset; Martine Valette; Quentin Semanas                                                                                                                                       |
| EPI_ISL_1696047                                                                                                                                                                                                                              | E.F.S B.F.C JEAN MINJOZ                                                | Department of Virology, Henri Mondor University Hospital, Assistance Publique Hôpitaux de Paris, Université Paris-Est Créteil, INSERM U955 | Alexandre Soulier; Christophe Rodriguez; Elisabeth Trawinski; Guillaume Gricourt; Jean-Michel Pawlotsky; Melissa N'Debi; Slim Fourati; Vanessa Demontant                                                                                                                         |
| EPI_ISL_1110194, EPI_ISL_1110195, EPI_ISL_1110196, EPI_ISL_1110197, EPI_ISL_1110198, EPI_ISL_1672700, EPI_ISL_1672744, EPI_ISL_1672745, EPI_ISL_1672746, EPI_ISL_1672747, EPI_ISL_1672748, EPI_ISL_1672749, EPI_ISL_1706658, EPI_ISL_1706661 | see above                                                              | Department of Virology, Henri Mondor University Hospital, Assistance Publique Hôpitaux de Paris, Université Paris-Est Créteil, INSERM U955 | Alexandre Soulier; Christophe Rodriguez; Elisabeth Trawinski; Guillaume Gricourt; Jean-Michel Pawlotsky; Melissa N'Debi; Slim Fourati; Vanessa Demontant                                                                                                                         |
| EPI_ISL_1672460, EPI_ISL_1672547, EPI_ISL_1755046, EPI_ISL_2179448, EPI_ISL_2259268                                                                                                                                                          | GH A.CHENEVIER-H.MONDOR                                                | Department of Virology, Henri Mondor University Hospital, Assistance Publique Hôpitaux de Paris, Université Paris-Est Créteil, INSERM U955 | Alexandre Soulier; Christophe Rodriguez; Elisabeth Trawinski; Guillaume Gricourt; Jean-Michel Pawlotsky; Melissa N'Debi; Slim Fourati; Vanessa Demontant                                                                                                                         |
| EPI_ISL_1672499                                                                                                                                                                                                                              | GH JOFFRE DUPUYTREN                                                    | Department of Virology, Henri Mondor University Hospital, Assistance Publique Hôpitaux de Paris, Université Paris-Est Créteil, INSERM U955 | Alexandre Soulier; Christophe Rodriguez; Elisabeth Trawinski; Guillaume Gricourt; Jean-Michel Pawlotsky; Melissa N'Debi; Slim Fourati; Vanessa Demontant                                                                                                                         |
| EPI_ISL_2179373, EPI_ISL_2179568, EPI_ISL_2179569, EPI_ISL_2179576                                                                                                                                                                           | GH de l'Est Francilien                                                 | Department of Virology, Henri Mondor University Hospital, Assistance Publique Hôpitaux de Paris, Université Paris-Est Créteil, INSERM U955 | Alexandre Soulier; Christophe Rodriguez; Elisabeth Trawinski; Guillaume Gricourt; Jean-Michel Pawlotsky; Melissa N'Debi; Slim Fourati; Vanessa Demontant                                                                                                                         |
| EPI_ISL_1696300, EPI_ISL_1696301                                                                                                                                                                                                             | Groupe LCD                                                             | Department of Virology, Henri Mondor University Hospital, Assistance Publique Hôpitaux de Paris, Université Paris-Est Créteil, INSERM U955 | Alexandre Soulier; Christophe Rodriguez; Elisabeth Trawinski; Guillaume Gricourt; Jean-Michel Pawlotsky; Melissa N'Debi; Slim Fourati; Vanessa Demontant                                                                                                                         |

|                                                                                                                                                                                                                                                                                                                                                                                                                                                                                                                                                                                                                                                                      |                                                           |                                                                                                                                                                    |                                                                                                                                                                                                                                                                                                                                                                                                                                                                                                                                                       |
|----------------------------------------------------------------------------------------------------------------------------------------------------------------------------------------------------------------------------------------------------------------------------------------------------------------------------------------------------------------------------------------------------------------------------------------------------------------------------------------------------------------------------------------------------------------------------------------------------------------------------------------------------------------------|-----------------------------------------------------------|--------------------------------------------------------------------------------------------------------------------------------------------------------------------|-------------------------------------------------------------------------------------------------------------------------------------------------------------------------------------------------------------------------------------------------------------------------------------------------------------------------------------------------------------------------------------------------------------------------------------------------------------------------------------------------------------------------------------------------------|
| EPI_ISL_1731504<br>EPI_ISL_1239447                                                                                                                                                                                                                                                                                                                                                                                                                                                                                                                                                                                                                                   | HOPITAL DU MONT DORE<br>HOPITAL MARIN HENDAYE             | CHU Clermont-Ferrand, service de virologie<br>CNR Virus des Infections Respiratoires - France SUD                                                                  | Bisseux Maxime; Combes Patricia; Henquell Cécile; Mirand Audrey<br>Antonin Bal; Bruno Lina; Bruno Simon; Gregory Destras; Gwendolyne Burfin; Hadrien Regue; Laurence Josset; Martine Valette; Quentin Semanas                                                                                                                                                                                                                                                                                                                                         |
| EPI_ISL_1111061, EPI_ISL_1118883, EPI_ISL_1118891, EPI_ISL_1118898, EPI_ISL_1118899, EPI_ISL_1239371, EPI_ISL_1259300, EPI_ISL_1259305, EPI_ISL_1336334, EPI_ISL_2178465, EPI_ISL_2363514                                                                                                                                                                                                                                                                                                                                                                                                                                                                            | see above                                                 | Hopital<br>National Reference Center for Viruses of Respiratory Infections, Institut Pasteur, Paris                                                                | Angela Brisebarre; Camille Capel; Christophe Malabat; Corinne Maufrais; Damien Mornico; Ducancelle Alexandra; Ducancelle Alexandra; Etienne Simon-Lorière; Frédéric Lemoine; Gastli Nabil; Lagathu GisÈLe; Louise Lefrançois; Luizy Nelly; Marion Barbet; Martres Pascale; Maud Vanpeene; Méline Bizard; Scancarv Agnès; Sylvie Behillili; Sylvie van der Werf; Vincent Enouf                                                                                                                                                                         |
| EPI_ISL_1381819, EPI_ISL_1381820, EPI_ISL_1381824, EPI_ISL_1381825, EPI_ISL_1381826, EPI_ISL_1381827, EPI_ISL_1381831, EPI_ISL_1443884, EPI_ISL_1517032, EPI_ISL_1582704, EPI_ISL_1582708, EPI_ISL_1583043, EPI_ISL_2178413, EPI_ISL_2178501                                                                                                                                                                                                                                                                                                                                                                                                                         | see above                                                 | Hospital<br>National Reference Center for Viruses of Respiratory Infections, Institut Pasteur, Paris                                                               | Amaury Vaysse; Angela Brisebarre; Bressollette CéLine; Camille Capel; Christophe Malabat; Clémence Guillaume; Corinne Maufrais; CéLine Bressollette; Etienne Simon-Lorière; Frédéric Lemoine; Gastli Nabil; Jérôme Guinard; Louise Lefrançois; LéA Pilorge; Marion Barbet; Maud Vanpeene; Méline Bizard; Pierre Lechat; Pilorge LéA; Sylvie Behillili; Sylvie Van der Werf; Sylvie van der Werf; Thibault Guinoiseau; Vincent Enouf                                                                                                                   |
| EPI_ISL_1110181, EPI_ISL_1110207, EPI_ISL_1672676, EPI_ISL_1672679, EPI_ISL_1672704                                                                                                                                                                                                                                                                                                                                                                                                                                                                                                                                                                                  | Hôpital Avicenne                                          | Department of Virology, Henri Mondor University Hospital, Assistance Publique Hôpitaux de Paris, Université Paris-Est Créteil, INSERM U955                         | Alexandre Soulier; Christophe Rodriguez; Elisabeth Trawinski; Guillaume Gricourt; Jean-Michel Pawlotsky; Melissa N'Debi; Slim Fourati; Vanessa Demontant                                                                                                                                                                                                                                                                                                                                                                                              |
| EPI_ISL_2467555, EPI_ISL_2467575, EPI_ISL_2467672                                                                                                                                                                                                                                                                                                                                                                                                                                                                                                                                                                                                                    | Hôpital Bichat Claude Bernard, Laboratoire de Virologie   | IAME UMR1137 Inserm, Université de Paris, Hôpital Bichat                                                                                                           | Alexandre Storto; Amélie Recoing; Antoine Bridier-Nahmias; Benoit Visseaux; Charlotte Charpentier; Diane Descamps; Gilles Collin; Lena Daniel; Mélanie Bertine; Nadhira Houhou-Fidouh; Quentin Le Hingrat; Siham Hamri                                                                                                                                                                                                                                                                                                                                |
| EPI_ISL_1085610, EPI_ISL_1085617, EPI_ISL_1088552, EPI_ISL_1088554, EPI_ISL_1088565, EPI_ISL_1088566, EPI_ISL_1110156, EPI_ISL_1110157, EPI_ISL_1110173, EPI_ISL_1110178, EPI_ISL_1110203                                                                                                                                                                                                                                                                                                                                                                                                                                                                            | see above                                                 | Hôpital Henri Mondor<br>Department of Virology, Henri Mondor University Hospital, Assistance Publique Hôpitaux de Paris, Université Paris-Est Créteil, INSERM U955 | Alexandre Soulier; Christophe Rodriguez; Elisabeth Trawinski; Guillaume Gricourt; Jean-Michel Pawlotsky; Melissa N'Debi; Slim Fourati; Vanessa Demontant                                                                                                                                                                                                                                                                                                                                                                                              |
| EPI_ISL_1672723, EPI_ISL_1672794                                                                                                                                                                                                                                                                                                                                                                                                                                                                                                                                                                                                                                     | Hôpital Paul Brousse                                      | Department of Virology, Henri Mondor University Hospital, Assistance Publique Hôpitaux de Paris, Université Paris-Est Créteil, INSERM U955                         | Alexandre Soulier; Christophe Rodriguez; Elisabeth Trawinski; Guillaume Gricourt; Jean-Michel Pawlotsky; Melissa N'Debi; Slim Fourati; Vanessa Demontant                                                                                                                                                                                                                                                                                                                                                                                              |
| EPI_ISL_1110170, EPI_ISL_1110210                                                                                                                                                                                                                                                                                                                                                                                                                                                                                                                                                                                                                                     | Hôpital Pitié-Salpêtrière                                 | Department of Virology, Henri Mondor University Hospital, Assistance Publique Hôpitaux de Paris, Université Paris-Est Créteil, INSERM U955                         | Alexandre Soulier; Christophe Rodriguez; Elisabeth Trawinski; Guillaume Gricourt; Jean-Michel Pawlotsky; Melissa N'Debi; Slim Fourati; Vanessa Demontant                                                                                                                                                                                                                                                                                                                                                                                              |
| EPI_ISL_1672452, EPI_ISL_1672453                                                                                                                                                                                                                                                                                                                                                                                                                                                                                                                                                                                                                                     | Hôpitaux Universitaires de Strasbourg NHC                 | Department of Virology, Henri Mondor University Hospital, Assistance Publique Hôpitaux de Paris, Université Paris-Est Créteil, INSERM U955                         | Alexandre Soulier; Christophe Rodriguez; Elisabeth Trawinski; Guillaume Gricourt; Jean-Michel Pawlotsky; Melissa N'Debi; Slim Fourati; Vanessa Demontant                                                                                                                                                                                                                                                                                                                                                                                              |
| EPI_ISL_1097023, EPI_ISL_5032150<br>EPI_ISL_6101653                                                                                                                                                                                                                                                                                                                                                                                                                                                                                                                                                                                                                  | IHU Mediterranee Infection<br>LABO BIO DOC                | IHU Mediterranee Infection<br>CHU Purpan - Laboratoire de Virologie - Institut Fédératif de Biologie                                                               | Philippe Colson; Philippe Colson et al.<br>Bulach T.; Donnadieu C.; Izopet J.; Latour J.; Milhes M.; Nicot F.; Ranger N.; Salin G.; Tremeaux P.                                                                                                                                                                                                                                                                                                                                                                                                       |
| EPI_ISL_1313043<br>EPI_ISL_4646397                                                                                                                                                                                                                                                                                                                                                                                                                                                                                                                                                                                                                                   | LABORATOIRE ALPIGENE<br>LABORATOIRE BIO3                  | CNR Virus des Infections Respiratoires - France SUD<br>CHU Purpan - Laboratoire de Virologie - Institut Fédératif de Biologie                                      | Antonin Bal; Bruno Lina; Bruno Simon; Gregory Destras; Gwendolyne Burfin; Hadrien Regue; Laurence Josset; Martine Valette; Quentin Semanas<br>Bulach T.; Donnadieu C.; Izopet J.; Latour J.; Milhes M.; Nicot F.; Ranger N.; Salin G.; Tremeaux P.                                                                                                                                                                                                                                                                                                    |
| EPI_ISL_1403498                                                                                                                                                                                                                                                                                                                                                                                                                                                                                                                                                                                                                                                      | LBA Casteljaloux                                          | Cerba Lab                                                                                                                                                          | Benazra M; Haïm-Boukobza S; Lecorche E; Olivi M; Roquebert B; Trombert-Paolantoni S; Zimmer S                                                                                                                                                                                                                                                                                                                                                                                                                                                         |
| EPI_ISL_1253552, EPI_ISL_1253553, EPI_ISL_1253554, EPI_ISL_1287741, EPI_ISL_1287742, EPI_ISL_1287743, EPI_ISL_1287744, EPI_ISL_1287747, EPI_ISL_1287749, EPI_ISL_1287750, EPI_ISL_1287751, EPI_ISL_1312994, EPI_ISL_1313000, EPI_ISL_1313001, EPI_ISL_1314035, EPI_ISL_1314039, EPI_ISL_1935386                                                                                                                                                                                                                                                                                                                                                                      | see above                                                 | LBM UNIBIO VALENTIN<br>CNR Virus des Infections Respiratoires - France SUD                                                                                         | Antonin Bal; Bruno Lina; Bruno Simon; Gregory Destras; Gwendolyne Burfin; Hadrien Regue; Laurence Josset; Martine Valette; Quentin Semanas                                                                                                                                                                                                                                                                                                                                                                                                            |
| EPI_ISL_1313015                                                                                                                                                                                                                                                                                                                                                                                                                                                                                                                                                                                                                                                      | LX BIO                                                    | CNR Virus des Infections Respiratoires - France SUD                                                                                                                | Antonin Bal; Bruno Lina; Bruno Simon; Gregory Destras; Gwendolyne Burfin; Hadrien Regue; Laurence Josset; Martine Valette; Quentin Semanas                                                                                                                                                                                                                                                                                                                                                                                                            |
| EPI_ISL_1118879, EPI_ISL_1118880, EPI_ISL_1118881, EPI_ISL_1118882, EPI_ISL_1118902, EPI_ISL_1118903, EPI_ISL_1118904, EPI_ISL_1118905, EPI_ISL_1118906, EPI_ISL_1118907, EPI_ISL_1118908, EPI_ISL_1118909, EPI_ISL_1259298, EPI_ISL_1259301, EPI_ISL_1259302, EPI_ISL_1259303, EPI_ISL_1336331, EPI_ISL_1336332, EPI_ISL_1336333, EPI_ISL_1443910, EPI_ISL_1623013, EPI_ISL_1739306, EPI_ISL_1739316, EPI_ISL_2178452, EPI_ISL_2178453, EPI_ISL_2178454, EPI_ISL_2178455, EPI_ISL_2178456, EPI_ISL_2178457, EPI_ISL_2178458, EPI_ISL_2178459, EPI_ISL_2178460, EPI_ISL_2178461, EPI_ISL_2178462, EPI_ISL_2178463, EPI_ISL_2259091, EPI_ISL_2363516, EPI_ISL_4211287 | see above                                                 | Labo Analyses Med<br>National Reference Center for Viruses of Respiratory Infections, Institut Pasteur, Paris                                                      | Amaury Vaysse; Angela Brisebarre; Bonnet Cyrille; Camille Capel; Christophe Malabat; Coignard Catherine; Corinne Maufrais; Damien Mornico; Desjardins Nicolas; Ducancelle Alexandra; Etienne Simon-Lorière; Fabienne Artur; Frédéric Lemoine; Holstein Anne; Hub de Bioinformatique et Biostatistiques; King Lisa; Le Berre David; Le Vicky; Louise Lefrançois; Mallet C; Marion Barbet; Maud Vanpeene; Melanie Caron; Méline Bizard; Ophélie Said-Delattre; Pierre Lechat; Sylvie Behillili; Sylvie Van der Werf; Sylvie van der Werf; Vincent Enouf |
| EPI_ISL_1754272                                                                                                                                                                                                                                                                                                                                                                                                                                                                                                                                                                                                                                                      | Laboratoire CBM 25 TERRE ROUGE                            | Department of Virology, Henri Mondor University Hospital, Assistance Publique Hôpitaux de Paris, Université Paris-Est Créteil, INSERM U955                         | Alexandre Soulier; Christophe Rodriguez; Elisabeth Trawinski; Guillaume Gricourt; Jean-Michel Pawlotsky; Melissa N'Debi; Slim Fourati; Vanessa Demontant                                                                                                                                                                                                                                                                                                                                                                                              |
| EPI_ISL_1201045, EPI_ISL_1201046, EPI_ISL_7807004                                                                                                                                                                                                                                                                                                                                                                                                                                                                                                                                                                                                                    | MEPHI, Aix Marseille University                           | MEPHI, Aix Marseille University                                                                                                                                    | Anthony LEVASSEUR                                                                                                                                                                                                                                                                                                                                                                                                                                                                                                                                     |
| EPI_ISL_1587554, EPI_ISL_1587569, EPI_ISL_1587570                                                                                                                                                                                                                                                                                                                                                                                                                                                                                                                                                                                                                    | NOVABIO BERGERAC                                          | CNR Virus des Infections Respiratoires - France SUD                                                                                                                | Antonin Bal; Bruno Lina; Bruno Simon; Gregory Destras; Gwendolyne Burfin; Hadrien Regue; Laurence Josset; Martine Valette; Quentin Semanas                                                                                                                                                                                                                                                                                                                                                                                                            |
| EPI_ISL_1707512, EPI_ISL_1707513, EPI_ISL_1707514, EPI_ISL_1707515, EPI_ISL_1707517                                                                                                                                                                                                                                                                                                                                                                                                                                                                                                                                                                                  | NOVABIO DORDOGNE                                          | CNR Virus des Infections Respiratoires - France SUD                                                                                                                | Antonin Bal; Bruno Lina; Bruno Simon; Gregory Destras; Gwendolyne Burfin; Hadrien Regue; Laurence Josset; Martine Valette; Quentin Semanas                                                                                                                                                                                                                                                                                                                                                                                                            |
| EPI_ISL_1253574, EPI_ISL_1253575, EPI_ISL_1253576                                                                                                                                                                                                                                                                                                                                                                                                                                                                                                                                                                                                                    | NOVELAB Ingels Vignon                                     | CNR Virus des Infections Respiratoires - France SUD                                                                                                                | Antonin Bal; Bruno Lina; Bruno Simon; Gregory Destras; Gwendolyne Burfin; Hadrien Regue; Laurence Josset; Martine Valette; Quentin Semanas                                                                                                                                                                                                                                                                                                                                                                                                            |
| EPI_ISL_934974<br>EPI_ISL_6157233                                                                                                                                                                                                                                                                                                                                                                                                                                                                                                                                                                                                                                    | Novabio<br>Pontivy SIDEP                                  | CNR Virus des Infections Respiratoires - France SUD<br>CHU Pontchaillou                                                                                            | Antonin Bal; Bruno Lina; Gregory Destras; Gwendolyne Burfin; Hadrien Règue; Laurence Josset; Martine Valette; Quentin Semanas                                                                                                                                                                                                                                                                                                                                                                                                                         |
| EPI_ISL_6101630, EPI_ISL_6101631                                                                                                                                                                                                                                                                                                                                                                                                                                                                                                                                                                                                                                     | SELAS CBM MURET CUGNOT                                    | CHU Purpan - Laboratoire de Virologie - Institut Fédératif de Biologie                                                                                             | DE TAYRAC Marie; DENOQUAL Florent; ETCHEVERRY Amandine; FEBREAU Christine; GALIBERT Marie Dominique; GROLHIER Claire; JAGLINE Steven; PRONIER Charlotte; QUENET Benjamin; SASSI Mohamed; THIBAULT Vincent<br>Bulach T.; Donnadieu C.; Izopet J.; Latour J.; Milhes M.; Nicot F.; Ranger N.; Salin G.; Tremeaux P.                                                                                                                                                                                                                                     |
| EPI_ISL_1787536<br>EPI_ISL_2131453                                                                                                                                                                                                                                                                                                                                                                                                                                                                                                                                                                                                                                   | Synlab Haut de France<br>UMR190-Unité des virus émergents | UMR 8199/1283 EGID<br>UMR190-Unité des virus émergents                                                                                                             | Derhourhi Mehdi<br>cecile Baronti                                                                                                                                                                                                                                                                                                                                                                                                                                                                                                                     |
| EPI_ISL_1290838, EPI_ISL_1312895<br>EPI_ISL_1707511                                                                                                                                                                                                                                                                                                                                                                                                                                                                                                                                                                                                                  | UNIBIO<br>UNIBIO ROMANS GAMBETTA                          | CNR Virus des Infections Respiratoires - France SUD<br>CNR Virus des Infections Respiratoires - France SUD                                                         | Antonin Bal; Bruno Lina; Bruno Simon; Gregory Destras; Gwendolyne Burfin; Hadrien Regue; Laurence Josset; Martine Valette; Quentin Semanas<br>Antonin Bal; Bruno Lina; Bruno Simon; Gregory Destras; Gwendolyne Burfin; Hadrien Regue; Laurence Josset; Martine Valette; Quentin Semanas                                                                                                                                                                                                                                                              |
| EPI_ISL_2094433, EPI_ISL_2491373<br>EPI_ISL_1336339, EPI_ISL_1336340                                                                                                                                                                                                                                                                                                                                                                                                                                                                                                                                                                                                 | cerballiance-IDF<br>hopital                               | Cerba lab<br>National Reference Center for Viruses of Respiratory Infections, Institut Pasteur, Paris                                                              | Aude Lessenne; Bénédicte Roquebert; Emmanuel Lecorche; Kader Merah; Laura Verdurme; Patrice Herisson; Sabine Trombert-Paolantoni; Stéphanie Haïm-Boukobza; Thierry Collin<br>Angela Brisebarre; Camille Capel; Etienne Simon-Lorière; Gastli Nabil; Marion Barbet; Maud Vanpeene; Méline Bizard; Sylvie Behillili; Sylvie van der Werf; Vincent Enouf                                                                                                                                                                                                 |
| EPI_ISL_1696154, EPI_ISL_1696182                                                                                                                                                                                                                                                                                                                                                                                                                                                                                                                                                                                                                                     | laboratoire Belle Epine                                   | Department of Virology, Henri Mondor University Hospital, Assistance Publique Hôpitaux de Paris, Université Paris-Est Créteil, INSERM U955                         | Alexandre Soulier; Christophe Rodriguez; Elisabeth Trawinski; Guillaume Gricourt; Jean-Michel Pawlotsky; Melissa N'Debi; Slim Fourati; Vanessa Demontant                                                                                                                                                                                                                                                                                                                                                                                              |
